# Supplementary material for: Certain Adenylated Non-Coding RNAs, Including 5′ Leader Sequences of Primary MicroRNA Transcripts, Accumulate in Mouse Cells following Depletion of the RNA Helicase MTR4
Source: PLoS One. 2014 Jun 13;9(6):e99430. doi: 10.1371/journal.pone.0099430 (PMC4057207; doi:10.1371/journal.pone.0099430)
Supplement: Table S1 — Quantitative RT-PCR results for U3 snoRNA. (XLSX) [file pone.0099430.s003.xlsx]

## Sheet: Table_S1_U3_qPCR
Table S1. Quantitative RT-PCR results for U3 snoRNA using two primer sets.
	cycB	"U3"	"U3" Ct ave.		Amount of
siRNA	Ct	Ct	-cycB Ct ave.	DDCt	Target Relative
	ave.	ave.			to Calibrator
mMtr4-2	20.35	22.15	1.8	-2.44	5.41
mMtr4-3	20	22.9	2.9	-1.59	3
mControl-2	20.66	24.9	4.24
mControl-3	20	24.49	4.49
	cycB	"U3"	"U3" Ct ave.		Amount of
siRNA	Ct	Ct	-cycB Ct ave.	DDCt	Target Relative
	ave.	ave.			to Calibrator
mMtr4-2	20.35	21.01	0.66	-2.87	7.33
mMtr4-3	20.3	21.12	0.82	-1.01	2.01
mControl-2	20.66	24.2	3.53
mControl-3	20	21.82	1.82
