# Supplementary material for: Certain Adenylated Non-Coding RNAs, Including 5′ Leader Sequences of Primary MicroRNA Transcripts, Accumulate in Mouse Cells following Depletion of the RNA Helicase MTR4
Source: PLoS One. 2014 Jun 13;9(6):e99430. doi: 10.1371/journal.pone.0099430 (PMC4057207; doi:10.1371/journal.pone.0099430)
Supplement: Table S2 — Mature mir322 levels exhibit no consistent fluctuations in mMtr4 depleted cells. (XLSX) [file pone.0099430.s004.xlsx]

## Sheet: Table_S2_mir322TaqMan
Table S2. Mature mir322 levels exhibit no consistent fluctuations in mMtr4 depleted cells.
	“Calibrator”	“Target”			Target
siRNA /	U6 Ct	mir322Ct	mir322 Ct ave	DDCt	Relative to
replicate	ave. + SD	ave. + SD	-U6 Ct ave.		Calibrator
mMtr4-2	25.52+0.03	28.11+0.26	2.59	-0.8	1.74
mControl-2	25.76+0.22	29.15+0.23	3.39
mMtr4-3	25.95+0.20	27.79+0.09	1.84	-1.14	2.2
mControl-3	24.67+0.24	27.65+0.03	2.98
mMtr4-4	25.49+0.14	31.98+0.08	6.49	0.48	0.72
mControl-4	24.39+0.04	30.40+0.16	6.01
Averages:
mMtr4KD	25.62+0.28	29.75+1.77	3.75	-0.54	1.46
mControlKD	24.82+0.47	29.11+1.12	4.29
