# Supplementary material for: Certain Adenylated Non-Coding RNAs, Including 5′ Leader Sequences of Primary MicroRNA Transcripts, Accumulate in Mouse Cells following Depletion of the RNA Helicase MTR4
Source: PLoS One. 2014 Jun 13;9(6):e99430. doi: 10.1371/journal.pone.0099430 (PMC4057207; doi:10.1371/journal.pone.0099430)
Supplement: Table S3 — All miR associated pA-seq reads. (XLSX) [file pone.0099430.s005.xlsx]

## Sheet: Table_S3_miRNA_pASeq
Table S3. All miR associated pA-seq reads
mir name	pA-seq readsa	modal positionb	Hairpin sequencec
mmu-mir-322	1257	22	cctcgttgactccgaagggctgcagcagcaattcatgttttggagtattgccaaggttcaaaacatgaagcgctgcaacaccccttcgtggggaa
mmu-let-7b	422	6	gcagggtgaggtagtaggttgtgtggtttcagggcagtgatgttgcccctccgaagataactatacaacctactgccttccctga
mmu-mir-138-1	377	22	ctctagcatggtgttgtgggacagctggtgttgtgaatcaggccgttgccaatcagagaacggctacttcacaacaccagggccacactgcactgcaag
mmu-let-7c-2	99	13	acggcctttggggtgaggtagtaggttgtatggttttgggctctgccccgctctgcggtaactatacaatctactgtctttcctgaagtggccgc
mmu-mir-106b	58	11	cctgctgggactaaagtgctgacagtgcagatagtggtcctctctgtgctaccgcactgtgggtacttgctgctccagcagg
mmu-mir-26b	46	14	tgcccgggacccagttcaagtaattcaggataggttgtggtgctgaccagcctgttctccattacttggctcgggggccggtgcc
mmu-mir-29a	37	15	accccttagaggatgactgatttcttttggtgttcagagtcaatagaattttctagcaccatctgaaatcggttataatgattgggga
mmu-mir-124-1	35	13	aggcctctctctccgtgttcacagcggaccttgatttaaatgtccatacaattaaggcacgcggtgaatgccaagaatggggctg
mmu-mir-463	31	3	ctttacctaatttgttgtccatcatgtaaaacataaatgatgatagacaccatataaggtagaggaaggttcact
mmu-mir-29b-1	28	3	aggaagctggtttcatatggtggtttagatttaaatagtgattgtctagcaccatttgaaatcagtgttct
mmu-mir-132	24	4	gggcaaccgtggctttcgattgttactgtgggaaccggaggtaacagtctacagccatggtcgccc
mmu-mir-212	23	15	gggcagcgcgccggcaccttggctctagactgcttactgcccgggccgccttcagtaacagtctccagtcacggccaccgacgcctggccc
mmu-mir-671	23	18	tggcaggccaggaagaggaggaagccctggaggggctggaggtgatggatgttttcctccggttctcagggctccacctctttcgagccgtagagcca
mmu-mir-21	20	15	tgtaccaccttgtcggatagcttatcagactgatgttgactgttgaatctcatggcaacagcagtcgatgggctgtctgacattttggtatc
mmu-mir-130a	18	1	gagctcttttcacattgtgctactgtctaacgtgtaccgagcagtgcaatgttaaaagggcatc
mmu-mir-23b	17	8	ggctgcttgggttcctggcatgctgatttgtgacttgagattaaaatcacattgccagggattaccacgcaacc
mmu-mir-33	14	5	ctgtggtgcattgtagttgcattgcatgttctggcaatacctgtgcaatgtttccacagtgcatcacgg
mmu-mir-883a	14	7	gcactataatgctgagagaagtagcagttactttattctataagtaactgcaacagctctcagtattgtaaggctc
mmu-mir-218-2	13	24	gaccagttgccgcggggctttcctttgtgcttgatctaaccatgtggtggaacgatggaaacggaacatggttctgtcaagcaccgcggaaagcatcgctctctcctgca
mmu-mir-742	12	4	tgctctactcacatggttgctaatcacgtgaagtgtaggtgaaagccaccatgctgggtaaagta
mmu-mir-24-1	12	4	ctccggtgcctactgagctgatatcagttctcatttcacacactggctcagttcagcaggaacaggag
mmu-let-7d	12	14	aatgggttcctaggaagaggtagtaggttgcatagttttagggcagagattttgcccacaaggagttaactatacgacctgctgcctttcttagggccttatt
mmu-mir-374	12	21	gaagaaatcctactcgggtggatataatacaacctgctaagtgttctagcacttagcaggttgtattatcattgtccgaggttatggctctcgtc
mmu-mir-871	11	10	tgcagtgctctattcagattagtgccagtcatgtgaaatacatatgactggcaccattctggataatgtaatgctca
mmu-mir-682	9	57	gccgtcggcatctggcactgtggttcctgcatgaaaacagtggccggcggggcctggacctacaacaccacctctgcagtcacagtgaagtctgcc
mmu-mir-431	8	12	cgtcctgcgaggtgtcttgcaggccgtcatgcaggccacactgacggtaacgttgcaggtcgtcttgcagggcttctcgcaagacgacatc
mmu-mir-7a-1	8	23	ttggatgttggcctagttctgtgtggaagactagtgattttgttgtttttagataactaaaacgacaacaaatcacagtctgccatatggcacaggccacctctacag
mmu-mir-1894	7	6	tctttgttctctctcccctaccacctgcctcttccctgctgtggagcaggcaagggagagggtgaagggagggccagccag
mmu-mir-433	7	14	tgcccggggagaagtacggtgagcctgtcattattcagagaggctagatcctctgtgttgagaaggatcatgatgggctcctcggtgttctccaggtagcggcaccacaccatgaaggcagccc
mmu-mir-29c	7	17	atctcttacacaggctgaccgatttctcctggtgttcagagtctgtttttgtctagcaccatttgaaatcggttatgatgtaggggga
mmu-mir-125a	6	5	ctgggtccctgagaccctttaacctgtgaggacgtccagggtcacaggtgaggttcttgggagcctgg
mmu-mir-466h	6	10	tgtatatttgtgtgtgcatgtgcttgtgtgtatgtgaatatatatatcatacgcacgcacacacacacacaaatgcaagca
mmu-mir-15a	6	14	cccttggagtaaagtagcagcacataatggtttgtggatgttgaaaaggtgcaggccatactgtgctgcctcaaaatacaagga
mmu-mir-495	5	3	aaagaagttgcccatgttatttttcgcttttatttgtgacgaaacaaacatggtgcacttctt
mmu-mir-23a	5	9	cggacggctggggttcctggggatgggatttgatgccagtcacaaatcacattgccagggatttccaactgaccc
mmu-mir-382	5	9	tacttgaagagaagttgttcgtggtggattcgctttacttgtgacgaatcattcacggacaacacttttttcagta
mmu-mir-384	5	12	tgttaaatcaggaattgtaaacaattcctaggcaatgtgtataatgttggtaagtcattcctagaaattgttcacaatgcctgtaaca
mmu-mir-17	5	12	gtcagaataatgtcaaagtgcttacagtgcaggtagtgatgtgtgcatctactgcagtgagggcacttgtagcattatgctgac
mmu-mir-103-2	5	14	gtcttcgtgctttcagcttctttacagtgctgccttgtagcattcaggtcaagcagcattgtacagggctatgaaagaaccaagaa
mmu-mir-328	5	18	ctgtctcggagcctggggcaggggggcaggaggggctcagggagaaagtatctacagcccctggccctctctgcccttccgtcccctgtccccaagt
mmu-mir-214	5	30	ggcctggctggacagagttgtcatgtgtctgcctgtctacacttgctgtgcagaacatccgctcacctgtacagcaggcacagacaggcagtcacatgacaacccagcct
mmu-mir-32	4	2	ggagatattgcacattactaagttgcatgttgtcacggcctcaatgcaatttagtgtgtgtgatattttc
mmu-mir-342	4	18	gaaaatgggctcaaggtgaggggtgctatctgtgattgagggacatggtcaatggaattgtctcacacagaaatcgcacccgtcaccttggcctgctga
mmu-mir-652	4	19	aggaacagctatgtactgcacaaccctaggagggggtgccattcacatagagtataattgaatggcgccactagggttgtgcagtgtacagcctacac
mmu-mir-1949	4	70	gctggttggcattctgggcctggttcatgccacctctgttgttaactataccaggatgtcagcatagttg
mmu-mir-149	3	3	ggctctggctccgtgtcttcactcccgtgtttgtccgaggagggagggagggacgggggcggtgct
mmu-mir-465a	3	4	gccctatttagaatggcactgatgtgataaaataaaaaattgatcagggcctttctaagtagagtaaggcttac
mmu-mir-503	3	5	tgccctagcagcgggaacagtactgcagtgagtgtttggtgccctggagtattgtttccactgcctgggta
mmu-mir-126	3	7	tgacagcacattattacttttggtacgcgctgtgacacttcaaactcgtaccgtgagtaataatgcgcggtca
mmu-mir-880	3	8	tgcactgcaatactcagattgatatgagtcacttcctattgcatgttactccatcctctctgagtagagtaaggcaca
mmu-mir-127	3	8	ccagcctgctgaagctcagagggctctgattcagaaagatcatcggatccgtctgagcttggctggtcgg
mmu-let-7e	3	12	cgcgccccccgggctgaggtaggaggttgtatagttgaggaagacacccgaggagatcactatacggcctcctagctttccccaggctgcgcc
mmu-mir-467d	3	14	cctgtgtgcataagtgcgcgcatgtatatgcgtgtatattttatgcatatacatacacacacctacacacacatgcacacagaca
mmu-mir-881	3	14	tgcagtacaatattcagagagataacagtcacatcttttctaaagtaactgtgtcttttctgaatagagtaatgttca
mmu-mir-98	3	15	ctgcacatgctggggtgaggtagtaagttgtattgttgtggggtagggattttaggccccagtaagaagataactatacaacttactactttccttggtgtgtggcat
mmu-mir-16-1	3	15	atgtcagcggtgccttagcagcacgtaaatattggcgttaagattctgaaattacctccagtattgactgtgctgctgaagtaaggttggcaa
mmu-mir-181c	3	16	gccaagggtttgggggaacattcaacctgtcggtgagtttgggcagctcagacaaaccatcgaccgttgagtggaccccgaggcctgga
mmu-mir-669f	3	19	tgtatgtgcctgtgtgtatagttgtgtgtgcatgtgcatgtgtgtatatgaatatacatatacatacacacacacgtataaacgcaagcacaaacacacacagaggaatggcactcgttga
mmu-mir-7a-2	3	23	ggtcgggccagccccgtttggaagactagtgattttgttgttgtgtctctgtatccaacaacaagtcccagtctgccacatggtgctggtcatttca
mmu-mir-669c	3	25	cctccatgtatgtgcatgtgtgtatagttgtgtgtggatgtgtgtatttgcatataaataacatacacacacacacacaagtaaacacaagtgcacaaacagacacagg
mmu-mir-30a	2	2	gcgactgtaaacatcctcgactggaagctgtgaagccacaaatgggctttcagtcggatgtttgcagctgc
mmu-let-7f-1	2	5	atcagagtgaggtagtagattgtatagttgtggggtagtgattttaccctgtttaggagataactatacaatctattgccttccctgag
mmu-mir-27b	2	6	aggtgcagagcttagctgattggtgaacagtgattggtttccgctttgttcacagtggctaagttctgcacct
mmu-mir-191	2	6	agcgggcaacggaatcccaaaagcagctgttgtctccagagcattccagctgcacttggatttcgttccctgct
mmu-mir-99b	2	10	ggcacccacccgtagaaccgaccttgcggggccttcgccgcacacaagctcgtgtctgtgggtccgtgtc
mmu-mir-298	2	10	ccaggcctttggcagaggagggctgttcttcccttgagttttatgactgggaggaactagccttctctcagcttaggagtgg
mmu-mir-26a-2	2	12	ggctgcggctggattcaagtaatccaggataggctgtgtccgtccatgaggcctgttcttgattacttgtttctggaggcagcg
mmu-mir-339	2	15	acggggtggccactatccctgtcctccaggagctcacgtatgcctgcctgtgagcgcctcggcgacagagccggtgtccacccctgcactgtccac
mmu-mir-181b-2	2	15	ttgatggctgcactcaacattcattgctgtcggtgggtttgaatgtcaaccaactcactgatcaatgaatgcaaactgcgggccaaaaa
mmu-mir-137	2	16	cttcggtgacgggtattcttgggtggataatacggattacgttgttattgcttaagaatacgcgtagtcgagg
mmu-mir-218-1	2	17	gtgataatggagcgagattttctgttgtgcttgatctaaccatgtgcttgcgaggtatgagaaaaacatggttccgtcaagcaccatggaacgtcacgcagctttctaca
mmu-mir-499	2	18	gggtgggcagctgttaagacttgcagtgatgtttagctcctctgcatgtgaacatcacagcaagtctgtgctgctgcct
mmu-mir-669a-1	2	19	tgtatgtgcatgtgtgtatagttgtgtgtgcatgttcatgtctatatttgaatatacataacatacacacacacgtataaacgcaagcacacataca
mmu-mir-30b	2	19	ctaagccaagtttcagttcatgtaaacatcctacactcagctgtcatacatgcgttggctgggatgtggatgtttacgtcagctgtcttggagtat
mmu-mir-29b-2	2	29	cttctggaagctggtttcacatggtggcttagatttttccatctttgtatctagcaccatttgaaatcagtgttttaggag
mmu-mir-707	2	83	ggcatgcagtcatgccgcttgcctacgcttgtgtgagcatgggcatgcggtcatagttgttgcgggcaattcg
mmu-mir-744	2	90	ggctgggcaaggtgcggggctagggctaacagcagtcttactgacggtttcctggaaaccacacacatgctgttgccactaacctcaaccttactcggtc
mmu-mir-743a	1	-6	ctgtattcagattggtgcctgtcatgtttataagaatgaaagacaccaagctgagtagagta
mmu-mir-299b	1	0	ggtttaccgtcccacatacatactcaaaatgtatgtgggacggtaaacc
mmu-mir-153	1	3	cggtgtcatttttgtgacgttgcagctagtaatatgagcccagttgcatagtcacaaaagtgatcattg
mmu-mir-378	1	4	agggctcctgactccaggtcctgtgtgttacctcgaaatagcactggacttggagtcagaaggcct
mmu-mir-188	1	5	tctcacatcccttgcatggtggagggtgagctctctgaaaacccctcccacatgcagggtttgcagga
mmu-mir-129-1	1	5	tggatctttttgcggtctgggcttgctgttctctcgacagtagtcaggaagcccttaccccaaaaagtatcta
mmu-mir-485	1	5	acttggagagaggctggccgtgatgaattcgattcatctaaacgagtcatacacggctctcctctcttctagt
mmu-mir-1968	1	5	cctcctctgcagctgttaaggatggtggactattgttagggccaccacctctgcagctgttaaggagg
mmu-mir-471	1	6	gtgctttacgtagtatagtgcttttcacattaaacaaaaagtgaaaggtgccatactatgtatagga
mmu-mir-185	1	6	agggattggagagaaaggcagttcctgatggtcccctcccaggggctggctttcctctggtcctt
mmu-mir-186	1	6	actttccaaagaattctccttttgggctttctcattttattttaagccctaaggtgaattttttgggaagt
mmu-mir-470	1	8	cagtgctcttcttggactggcactggtgagttaaactaaatacaaccagtacctttctgagaagagtaaagctca
mmu-mir-878	1	10	tgcaatgctttatctagttggatgtcaagacacgtgaaacttaagtgcatgacaccacactgggtagaggagggctca
mmu-mir-465c-2	1	10	tgcaatgccctatttagaatggcgctgatctgatgaataaaaaaaaaatgatcagggcctttctaagtagagtaaggctta
mmu-mir-465c-1	1	10	tgcaatgccctatttagaatggcgctgatctgatgaataaaaaaaaaatgatcagggcctttctaagtagagtaaggctta
mmu-mir-297a-5	1	10	ctgtgtgtatatgtatgtgtgcatgtgcatgtgtgtatatgagtatacatatacatacgcacatacccatacaagcatgcacacaaaccc
mmu-mir-883b	1	10	tgcaatgcattactgagaatgggtagcagtcactttgtactatgagtaactgcaacatctctcagtattgtaaggttc
mmu-mir-700	1	11	ttcactgggagtaaggctccttcctgtgcttgcaggggagaaatacgaactgcacgcgggaaccgagtccacccccagt
mmu-mir-466d	1	11	catgtgtgtttgtgtgtgcgtacatgtacatgtgtgtatatgaatatacatatacatacacgcacacatagatacgcacgcacacacacacacagg
mmu-mir-466c	1	11	gtatatgtgttgatgtgtgtgtgcatgtacatatgtgaatatgatatacatatacatacacgcacacataagacacatatgagc
mmu-mir-743b	1	12	tgcagtgctgtgttcagactggtgtccatcatgtgaaatatttgtgaaagacatcatgctgaatagagtaaggccca
mmu-mir-25	1	13	ggccagtgttgagaggcggagacttgggcaattgctggacgctgccctgggcattgcacttgtctcggtctgacagtgccggcc
mmu-mir-181a-1	1	13	ggttgcttcagtgaacattcaacgctgtcggtgagtttggaattcaaataaaaaccatcgaccgttgattgtaccctatagctaacc
mmu-mir-497	1	14	cctgcccccgccccagcagcacactgtggtttgtacggcactgtggccacgtccaaaccacactgtggtgttagagcgagggta
mmu-mir-411	1	14	tggtacttggagagatagtagaccgtatagcgtacgctttatctgtgacgtatgtaacacggtccactaaccctcagtatca
mmu-mir-140	1	14	cctgccagtggttttaccctatggtaggttacgtcatgctgttctaccacagggtagaaccacggacagg
mmu-mir-101a	1	14	aggctgccctggctcagttatcacagtgctgatgctgtccattctaaaggtacagtactgtgataactgaaggatggcagcca
mmu-mir-666	1	17	ctgattctgcctgcgtggagcgggcacagctgtgagagccccctaggtacagcggggctgcagcgtgatcgcctgctcacgcacaggaagtgacgacag
mmu-mir-669b	1	24	atgaatgtatgtgcatgtgtatatagttttgtgtgcatgtgcatgtgtgtctattaatgtacatatacatacacacaaacatatacacgcatgcgca
mmu-mir-338	1	24	caacgctgcacaggccgtcctccccaacaatatcctggtgctgagtgggtgcacagtgactccagcatcagtgattttgttgaagagggcagctgcca
mmu-mir-674	1	24	ggcctagtcatcaccctgagccttgcactgagatgggagtggtgtaaggctcaggtatgcacagctcccatctcagaacaaggctcgggtgtgctcagct
mmu-mir-20a	1	24	gtgtgatgtgacagcttctgtagcactaaagtgcttatagtgcaggtagtgtgtagccatctactgcattacgagcacttaaagtactgccagctgtagaactccag
mmu-mir-331	1	25	gagtctggttttgtttgggtttgttctaggtatggtcccagggatcccagatcaaaccaggcccctgggcctatcctagaaccaacctaaacccgt
mmu-mir-708	1	26	ctgtgtttgaaatggggactgccctcaaggagcttacaatctagctgggggtagatgacttgcacttgaacacaactagactgtgagcttctagagggcaggggcctta
mmu-mir-423	1	28	acttgtgaggaaataaaggaagttaggctgaggggcagagagcgagacttttctattttccaaaagctcggtctgaggcccctcagtcttgcttcctaccccgcgcttg
mmu-mir-329	1	28	tgttcgcttctggtaccggaagagaggttttctgggtctctgtttctttgatgagaatgaaacacacccagctaacctttttttcagtatcaaatcc
mmu-mir-770	1	31	gccaccttctgtgcccccagcaccacgtgtctgggccacgtgagcaacgccacgtgggcctgacgtggagctggggccgcaggggtctgatggc
mmu-mir-337	1	34	cagtgtagtgagaagttggggggtgggaacggcgtcatgcaggagttgattgcacagccattcagctcctatatgatgcctttcttcacccccttca
mmu-mir-1982	1	36	gttggtattgcttgggagggtcctggggaggggagttctggcaccccaacctctcaccctatgttctcccacag
mmu-mir-1954	1	44	gaggtcagccagaactgcagagtgagaccctgttgtttgtttgtttgtttgagacggggtttctctgtgtagccctggctatccta
mmu-mir-181b-1	1	70	aggtcacaatcaacattcattgctgtcggtgggttgaactgtgtagaaaagctcactgaacaatgaatgcaactgtggcc
mmu-mir-692-2	1	78	ggtggcagggccacaaccagcgcagactggcgcgccccagggatctctgggcgagtatctctttgagcgcctcactctcaagcacgactaggaggcctctgtgccttcc
mmu-mir-1892	1	78	tggatatatttctactcttgaccaaagttttgtaagaaacaatacagaatttggggacgggagggaggatactttgagaa
mmu-mir-669k	1	92	tcttatgcccaccaaaaatgtgcatgtgtgtatagttgtgtgcatattcacttctctatatgaatatgcatatacacgcatgcaaacacattcataggaatggccagagctatatctcagttaggag
mmu-mir-669h	1	105	tgtgatgcccaccaaaaatatgcatgggtgtatagttgagtgcatattcatttctctatatgaatatgcatatacacacatgcacacacacacacactcacacacaggaatgacactcgtttatc
mmu-mir-568	1	120	acactatattatgtataaatgtatacacacttctatatatgtccacatatatgcggtgtgtgtattatacaggtataggtgtg
mmu-mir-686	1	153	gccacagcaggtgcttatattgcttcccagacggtgaagaaagtaatagagatcaacccgtaccttctgggcaccatggctgggggtgcagcggattgcagcttctggg
aNumber of reads at mode (+2bp)
bPosition of pA-seq read mode relative to the start of the hairpin; the presence of templated adenosines immediately surrounding the Drosha cleavage site can alter the precision of the mapped polyadenylation position.
cMature small RNA sequence indicated in bold; if no mature sequence corresponding to 5' arm exists in mirBase, the 3' sequence is in bold, and the sequence of the complemenatry duplex strand is underlined.
